# Supplementary material
Source: MDPI journal article supplement (https://www.mdpi.com/2073-4344/9/9/767)
Supplement: s1 [file s1]

# Supplementary Materials: Hierarchical PtIn/Mg(Al)O Derived from Reconstructed PtIn-hydrotalcite-like Compounds for Highly Efficient Propane Dehydrogenation

Jiaxin Li, Ming Zhang, Zhen Song, Shuo Liu, Jiameng Wang and Lihong Zhang\*

Department of Catalysis Science and Technology and Tianjin Key Laboratory of Applied Catalysis Science & Technology, School of Chemical Engineering and Technology, Tianjin University, Tianjin 300350, China; xgclone@163.com (J.L.), minne\_zhang@hotmail.com (M.Z.), songzhens12345@163.com (Z.S.), shuoecho@outlook.com (S.L.), wangjiameng0216@163.com (J.W.)

\* Correspondence: [zlh\\_224@163.com](mailto:zlh_224@163.com) or [zlh\\_224@tju.edu.cn](mailto:zlh_224@tju.edu.cn)

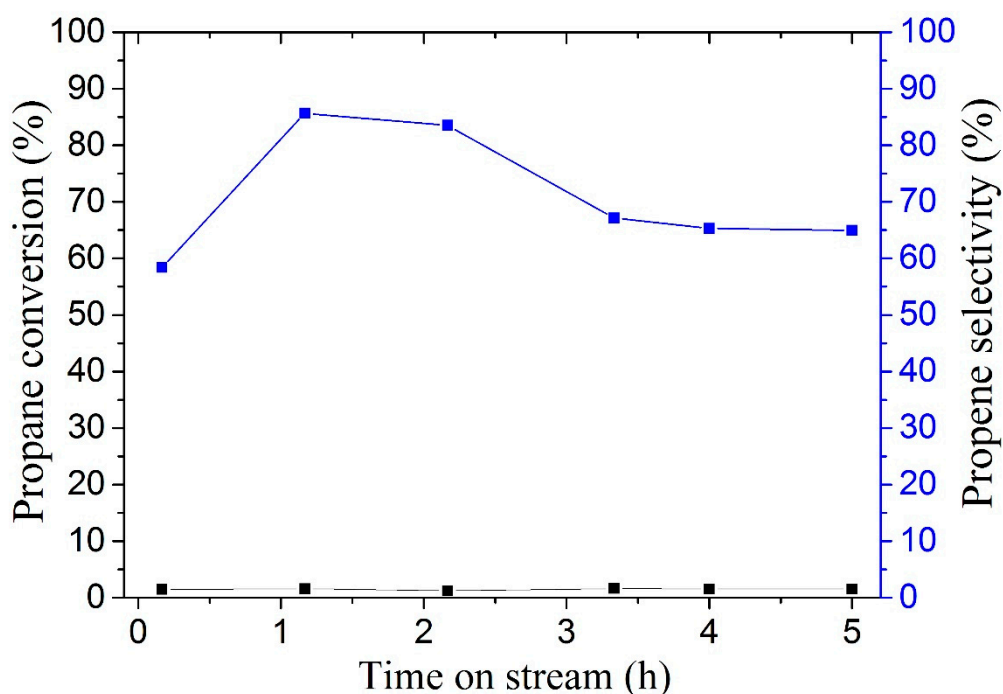

**Figure S1.** Propane conversion and propene selectivity as function of time for blank tube (reaction conditions:  $T = 600\text{ }^{\circ}\text{C}$ ,  $\text{H}_2 : \text{C}_3\text{H}_8 : \text{N}_2 = 7 : 8 : 35$  (molar ratio), weight hourly space velocity (WHSV) =  $3\text{ h}^{-1}$ ).

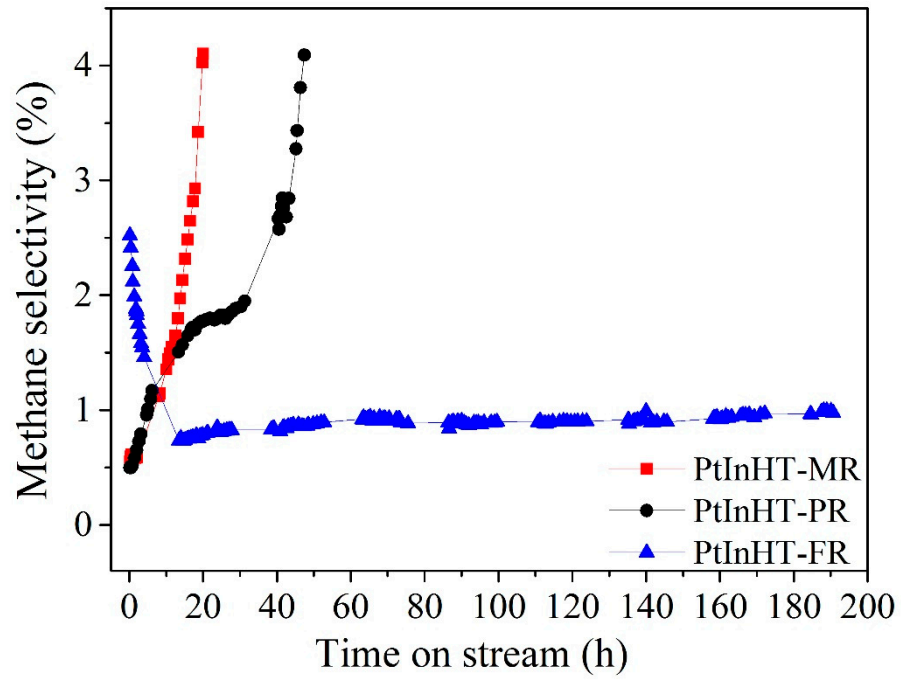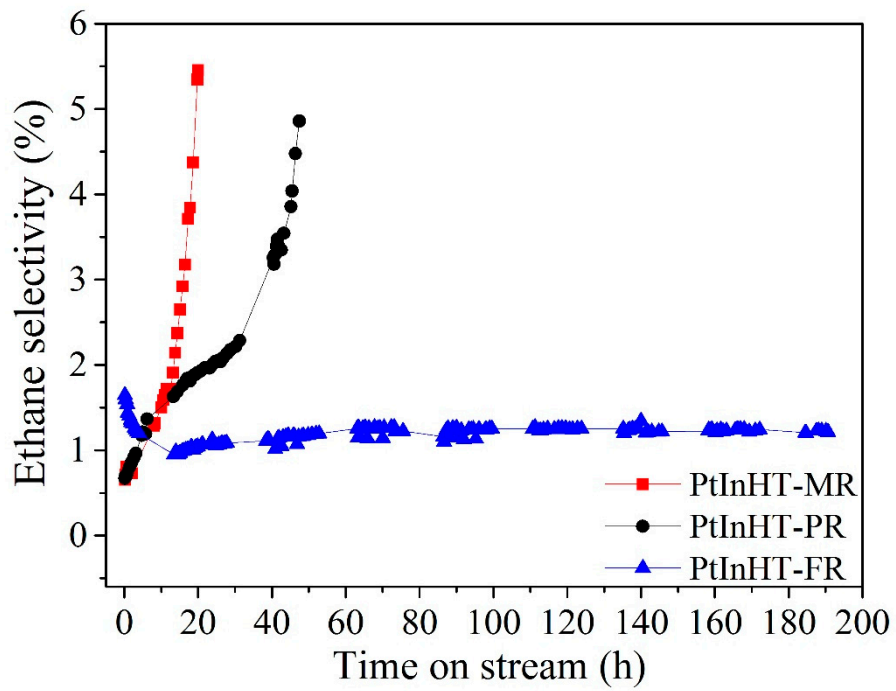

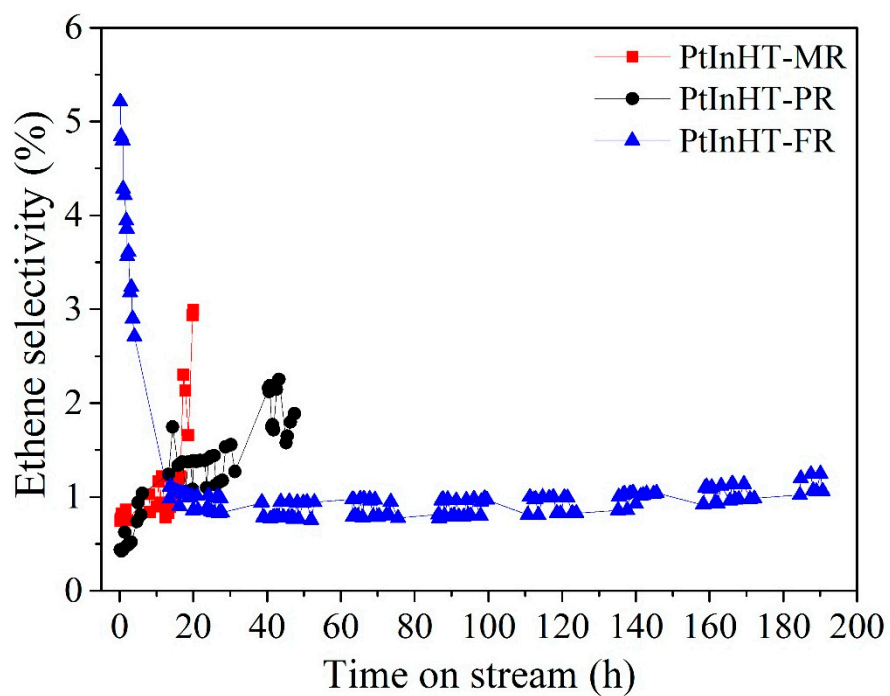

**Figure S2.** The selectivity of methane, ethane and ethene as function of time for different catalysts (reaction conditions:  $T = 600\text{ }^{\circ}\text{C}$ ,  $\text{H}_2 : \text{C}_3\text{H}_8 : \text{N}_2 = 7 : 8 : 35$  (molar ratio),  $\text{WHSV} = 3\text{ h}^{-1}$ ,  $m_{\text{cat}} = 0.4\text{ g}$ ).

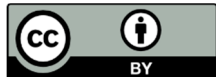

© 2019 by the authors. Submitted for possible open access publication under the terms and conditions of the Creative Commons Attribution (CC BY) license (<http://creativecommons.org/licenses/by/4.0/>).
